# Supplementary material
Source: PubMed Central journal article supplement (PMC4560174)

Fig S1 Maity et.al.,

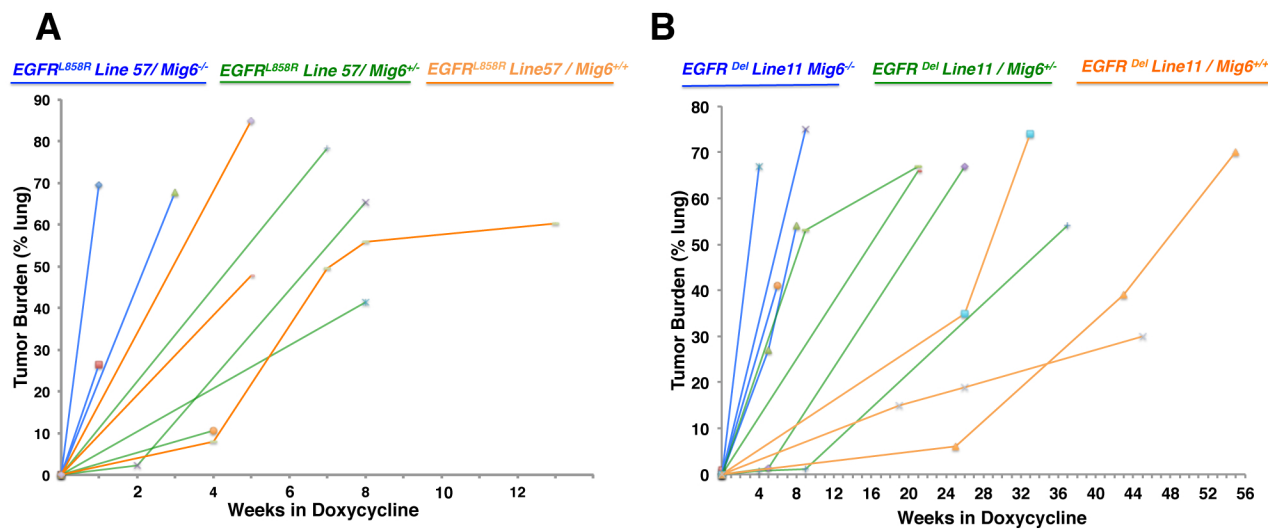

**C**

| Genotype |      |                | Pathology of Lung Phenotype |             |                         |                       |
|----------|------|----------------|-----------------------------|-------------|-------------------------|-----------------------|
| EGFR     | Mig6 | Number of Mice | Neoplasia                   | Macrophages | Bronchiolar Clara Cells | Alveolar Type 2 cells |
| Line 56  | +/-  | 14             | ++ A                        | +           | +/-                     | +                     |
| Line 56  | +/-  | 18             | ++ C                        | +           | +                       | ++                    |
| Line 56  | -/-  | 5              | +                           | ++ R        | ++                      | ++                    |
| Line 57  | +/-  | 3              | ++ A C                      | +(+)        | +                       | +++                   |
| Line 57  | +/-  | 7              | ++ C                        | +           | ++                      | ++(+)                 |
| Line 57  | -/-  | 4              | +++                         | +++ R       | +++                     | +++ E                 |
| Del 11   | +/-  | 6              | ++ A C                      | ++          | +                       | +++                   |
| Del 11   | +/-  | 12             | ++ C                        | ++          | ++                      | +++                   |
| Del 11   | -/-  | 7              | ++ C                        | +++ R       | ++                      | +++ E                 |

**D**

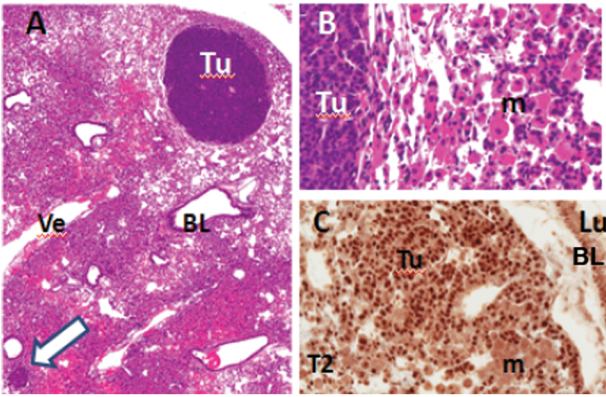

**E**

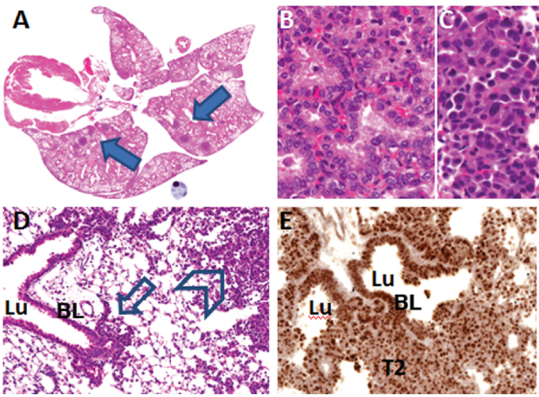

Fig S2 Maity et.al.,

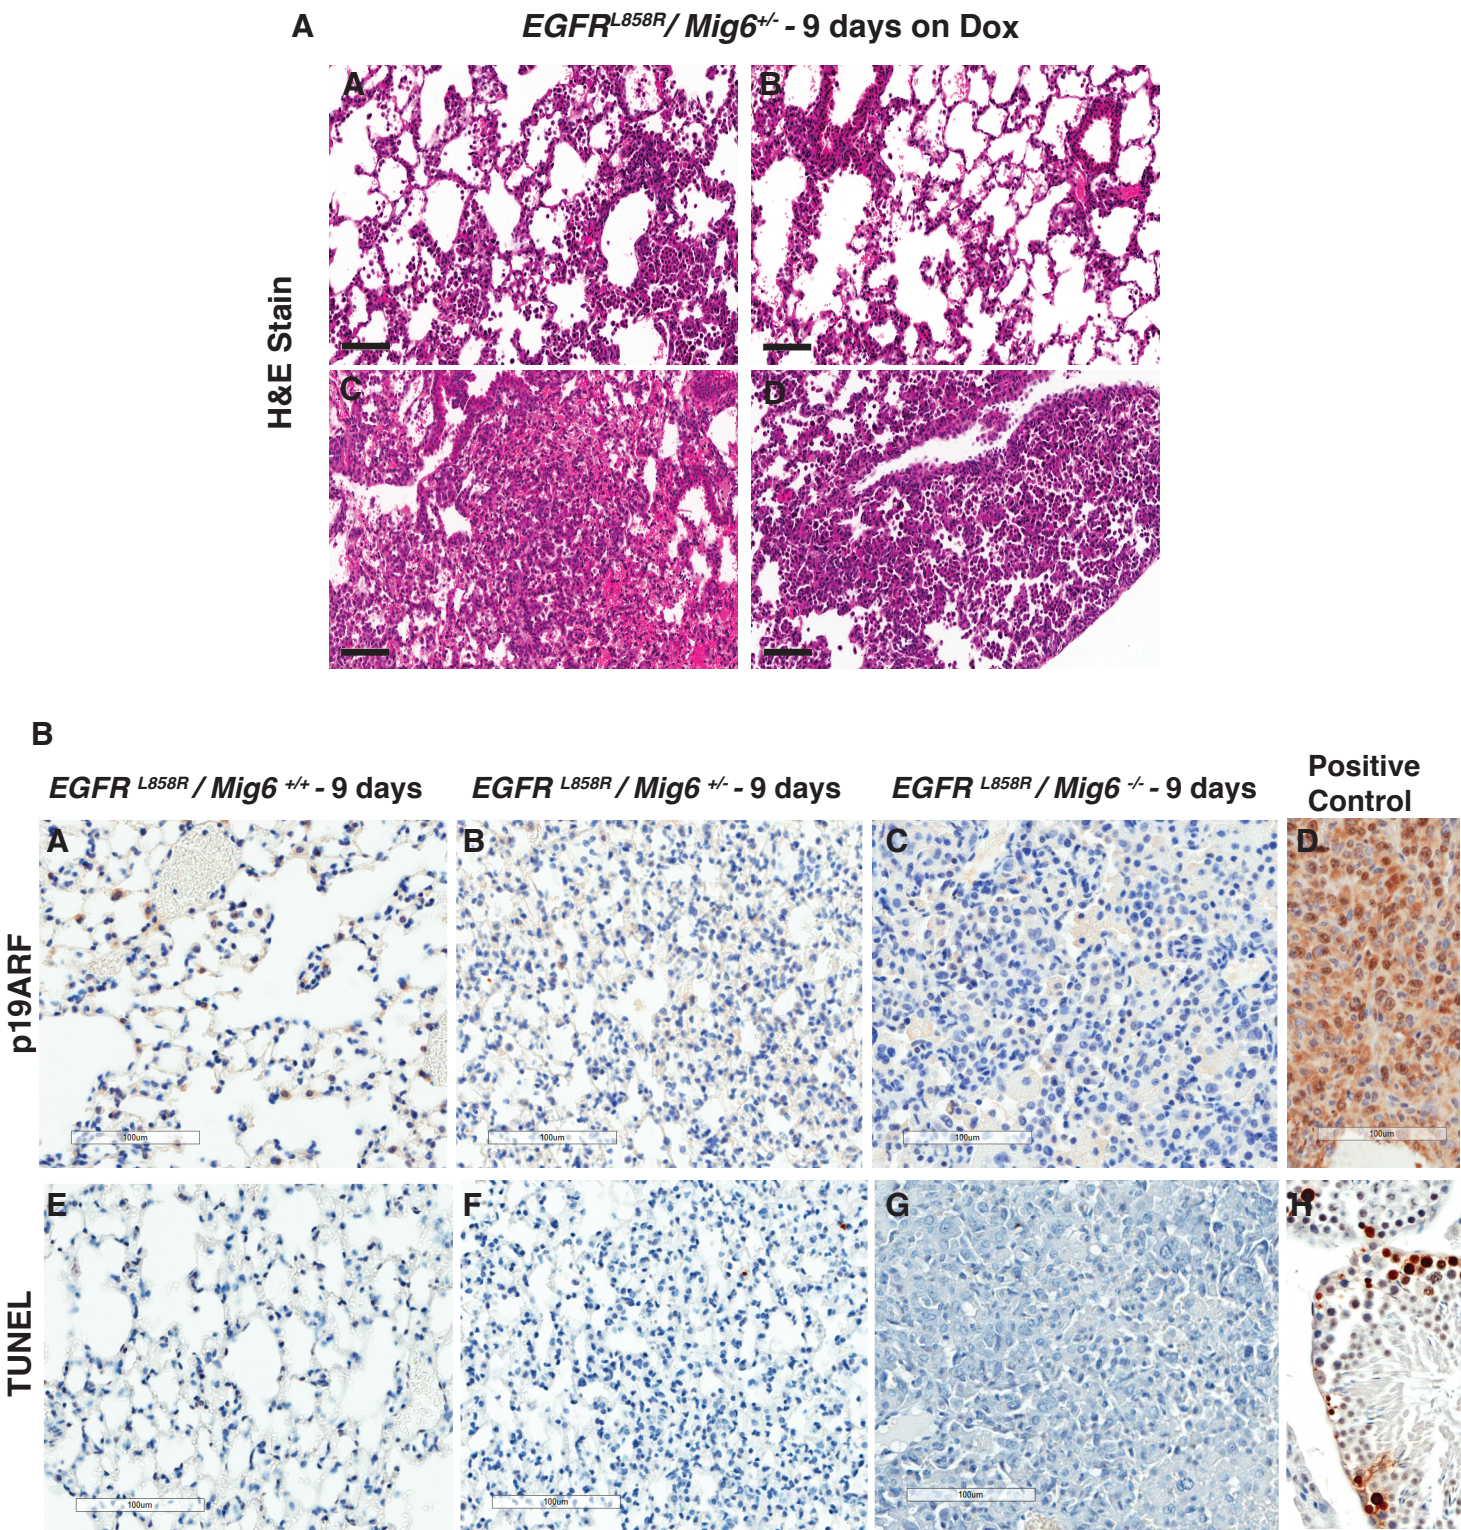

**Fig S3 Maity et.al.,**

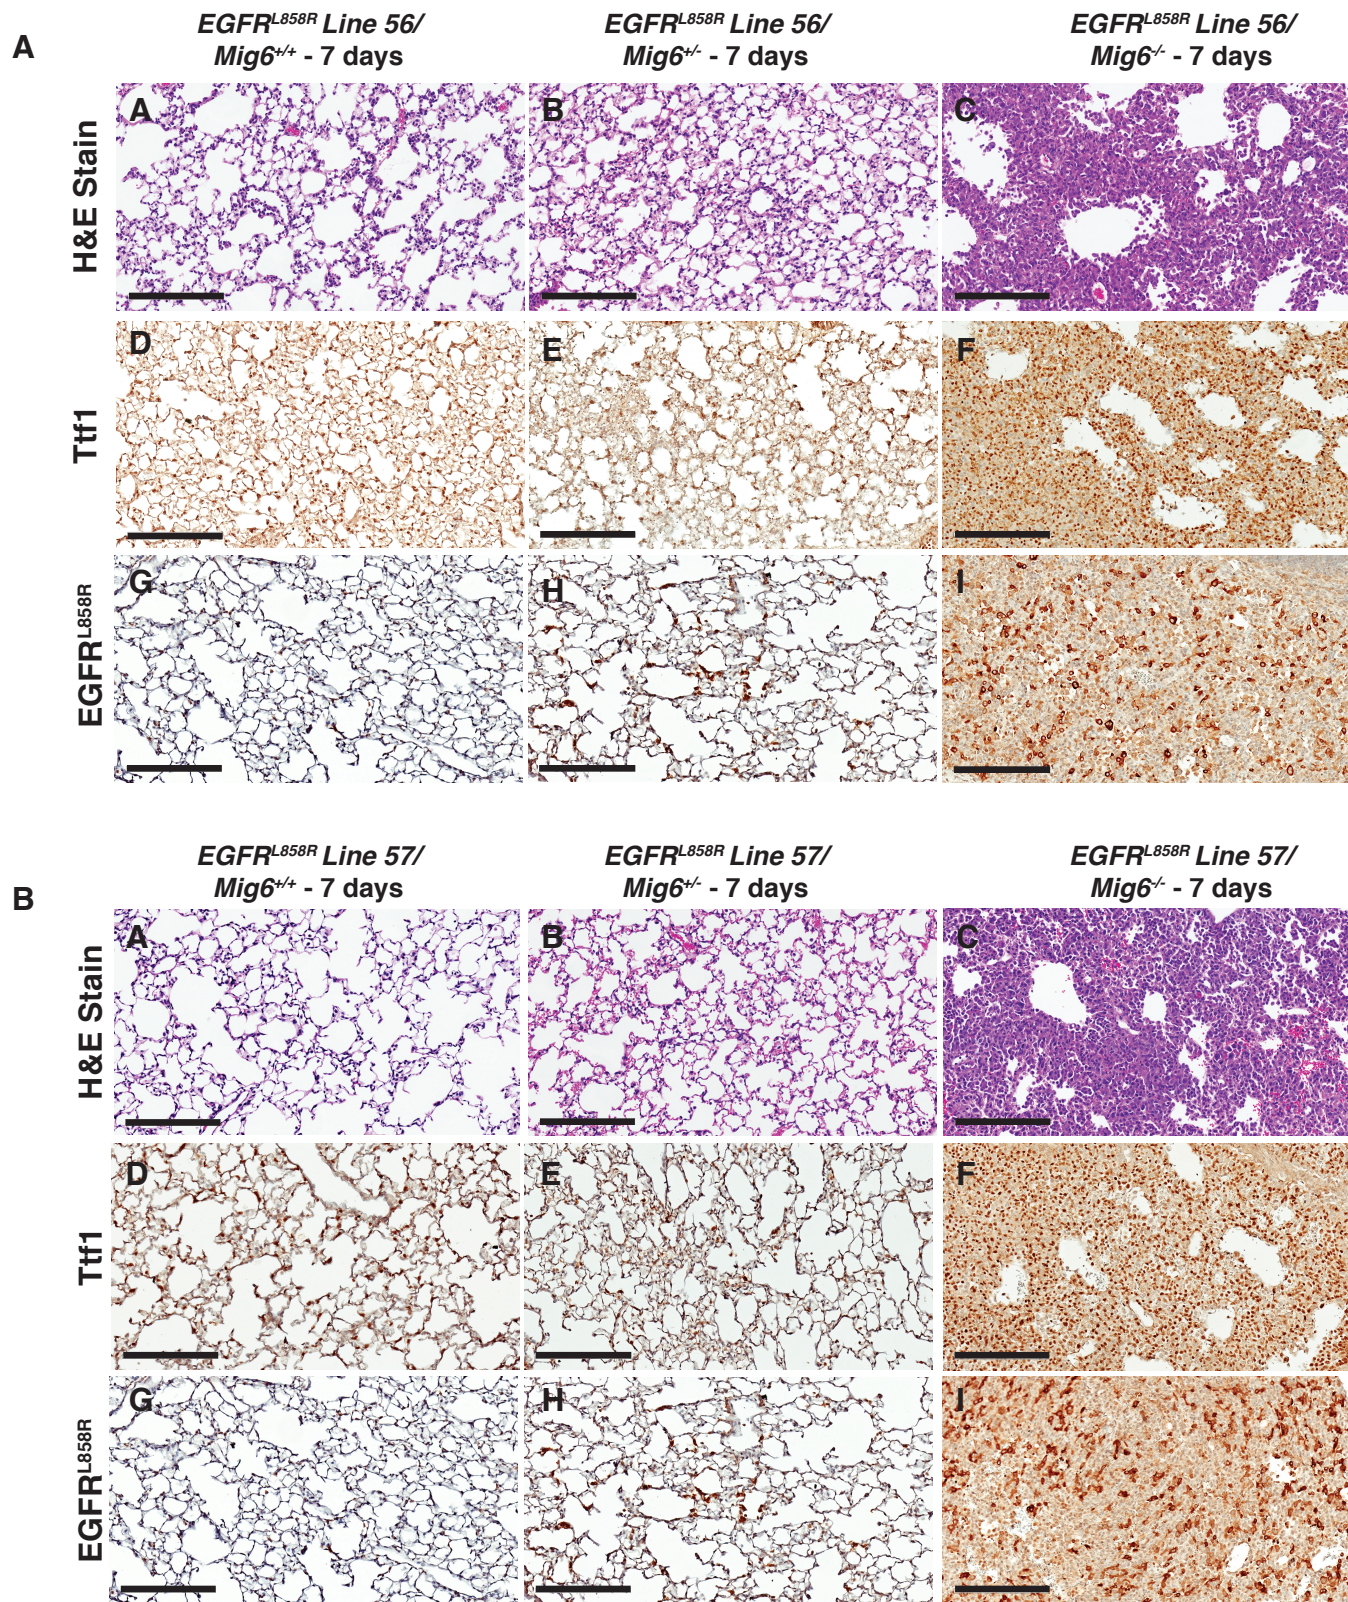

Fig S4 Maity et.al.,

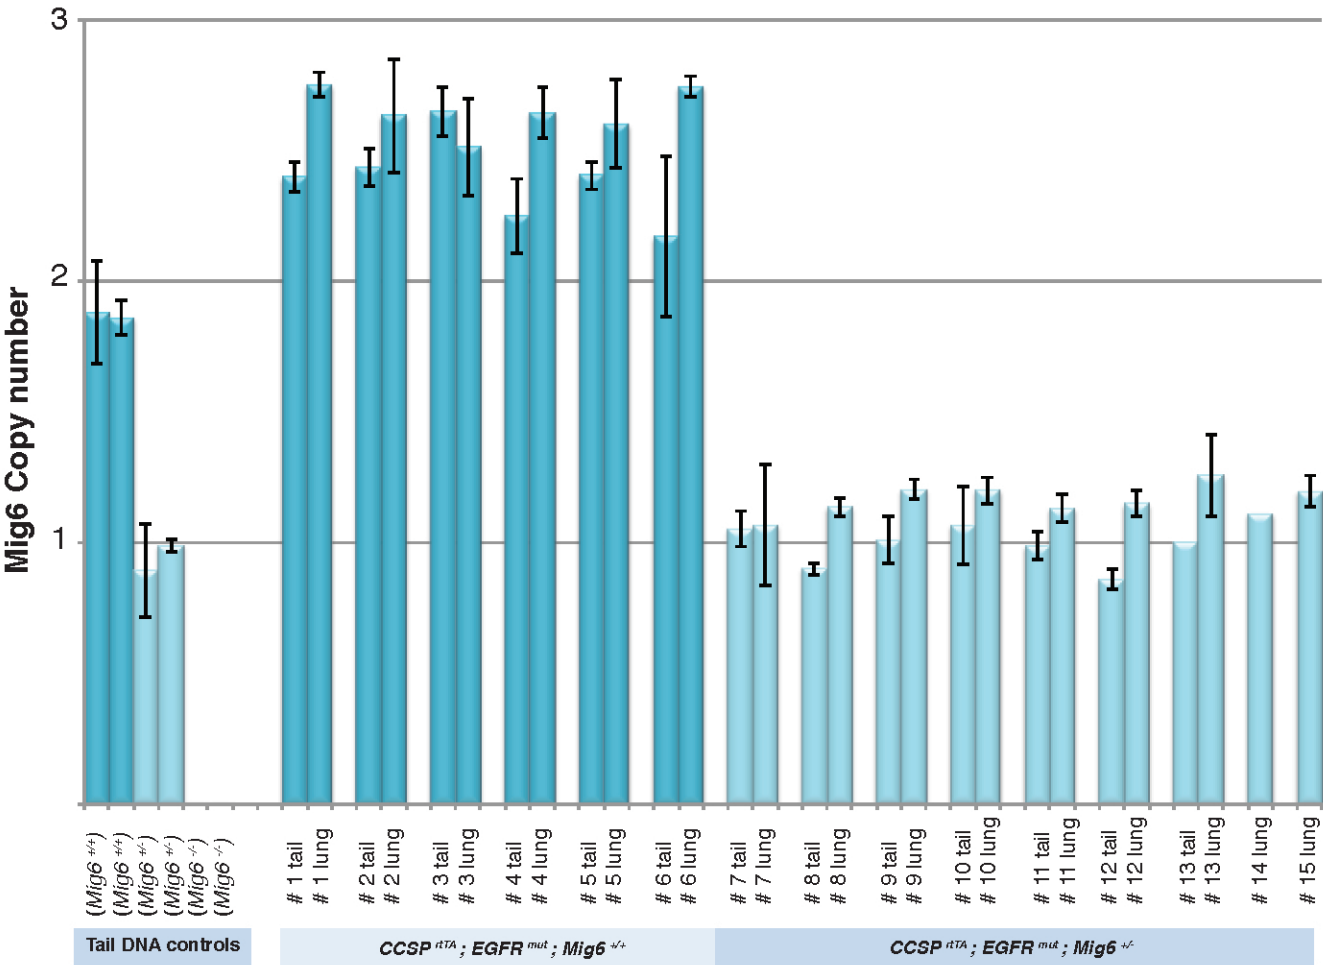

Fig S5 Maity et.al.,

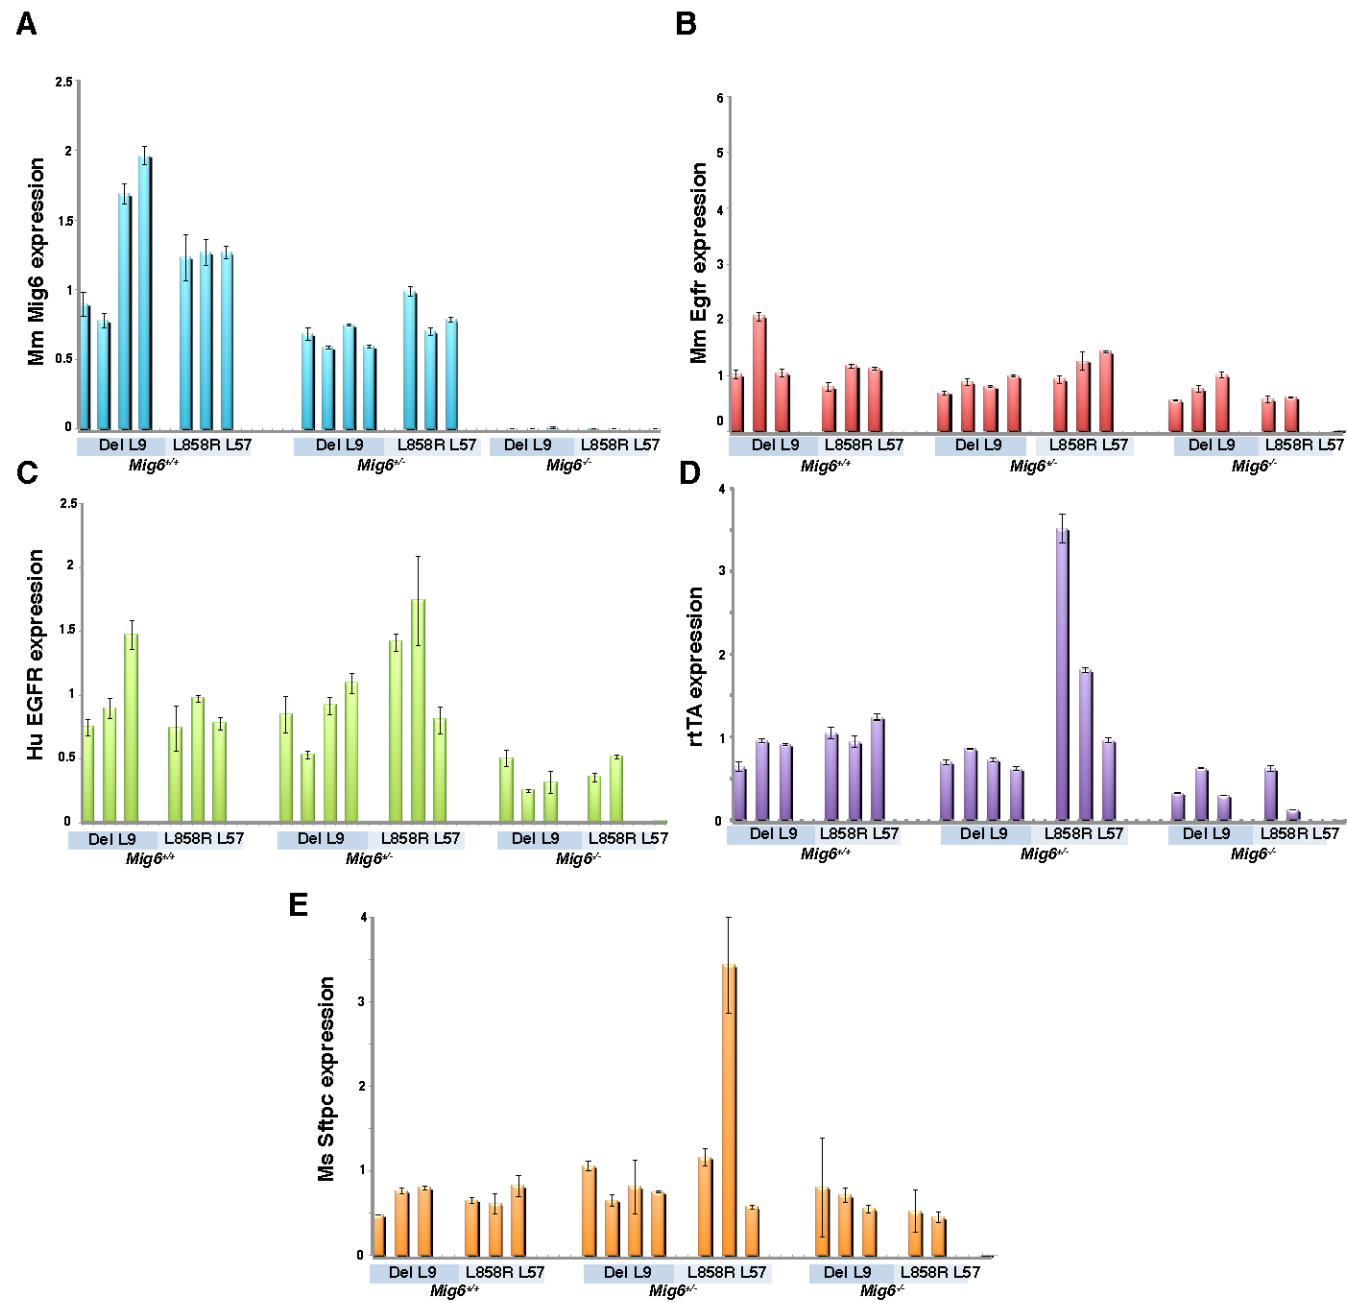

Fig S6 Maity et.al.,

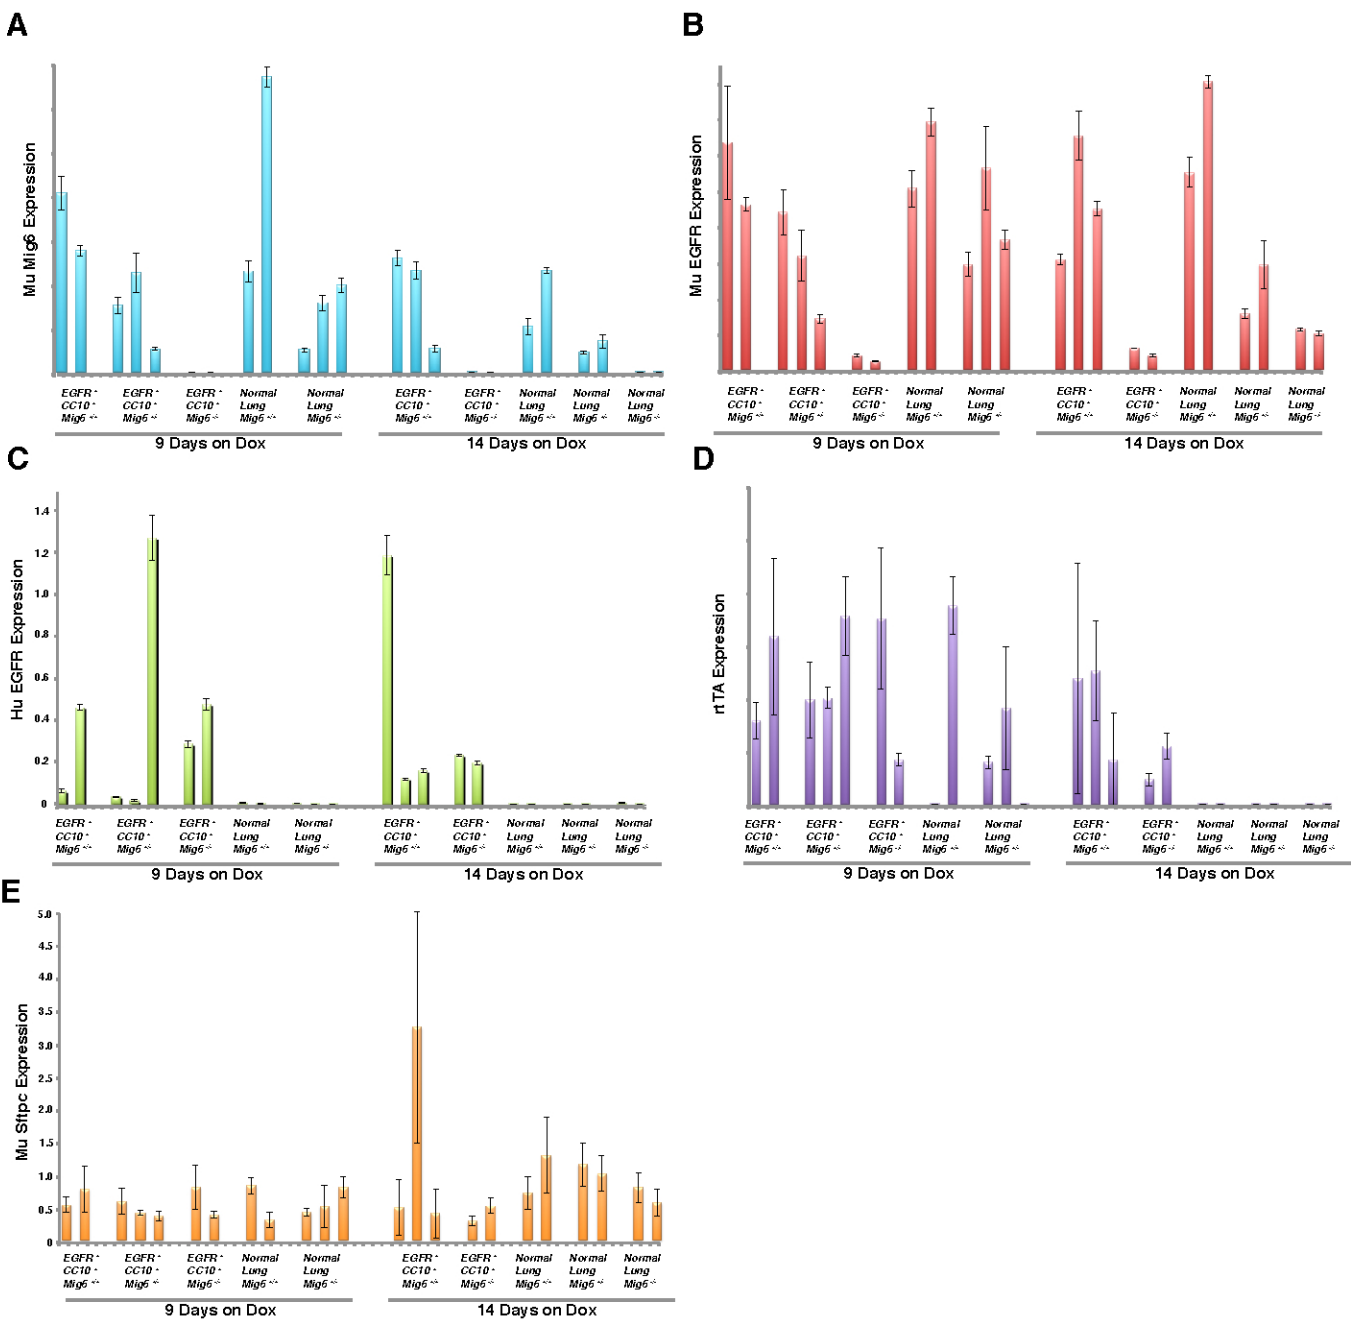

Fig S7 Maity et.al.,

ERRFI1 peptide: VSSTH<sup>y</sup>YLLPERPPYLDKYEK (Y394)

M / L : EGF stimulated / serum starved

H / M : Erlotinib + EGF stimulated / EGF stimulated

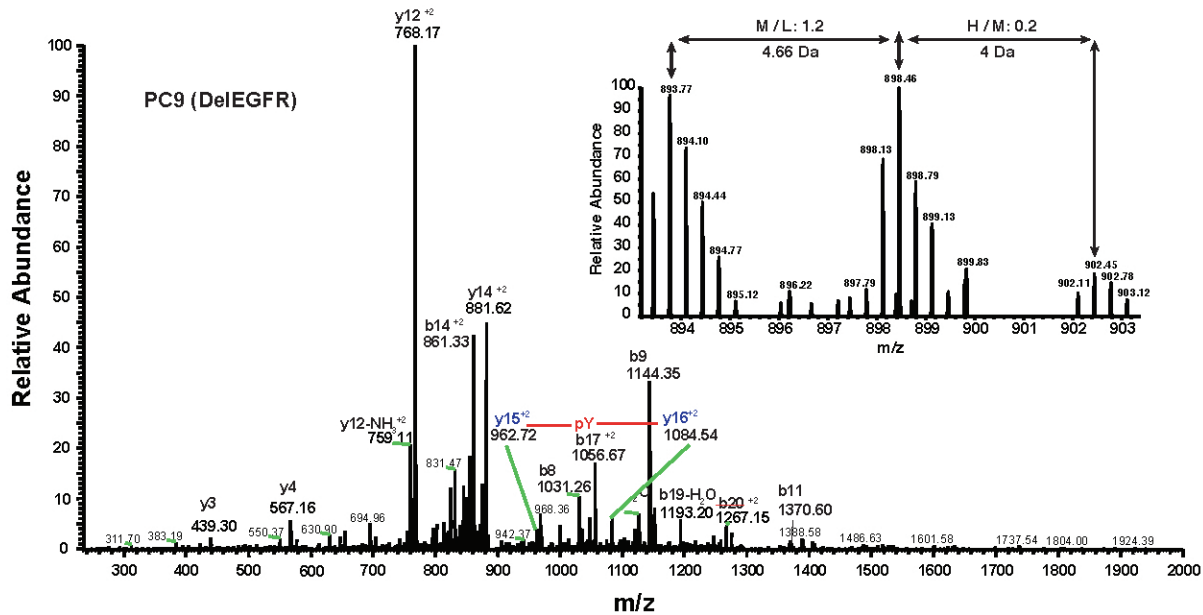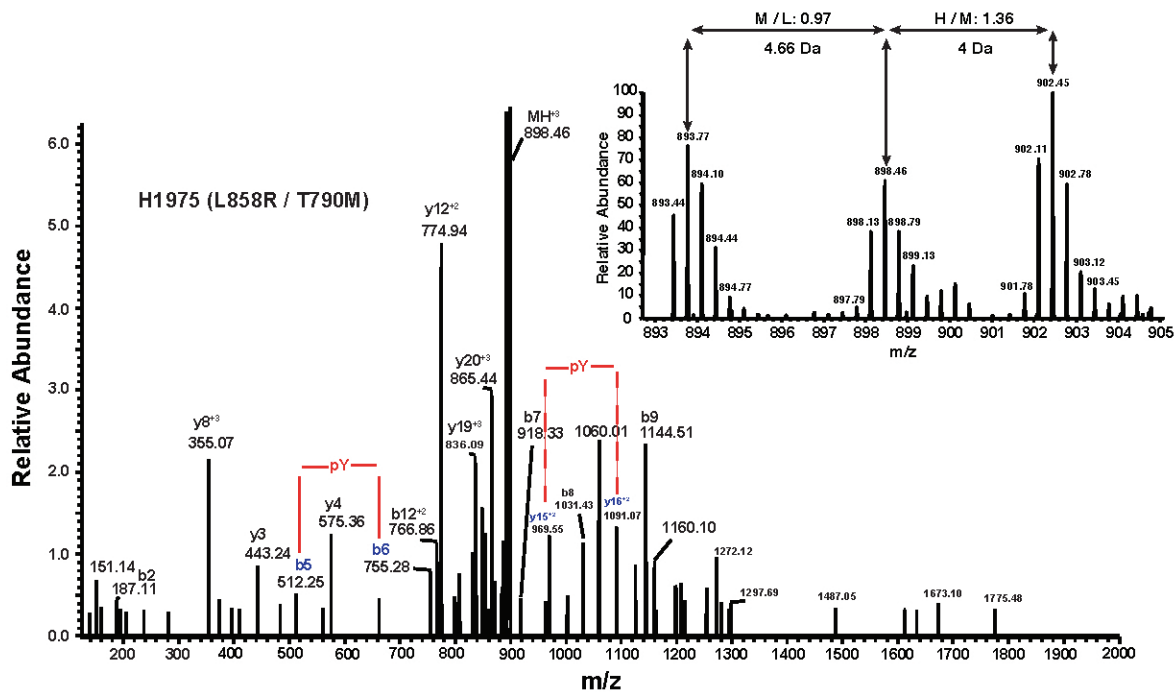

**Fig S8 Maity et al.,**

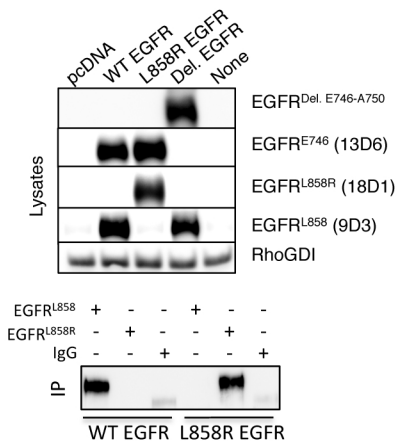

Fig S9 Maity et.al.,

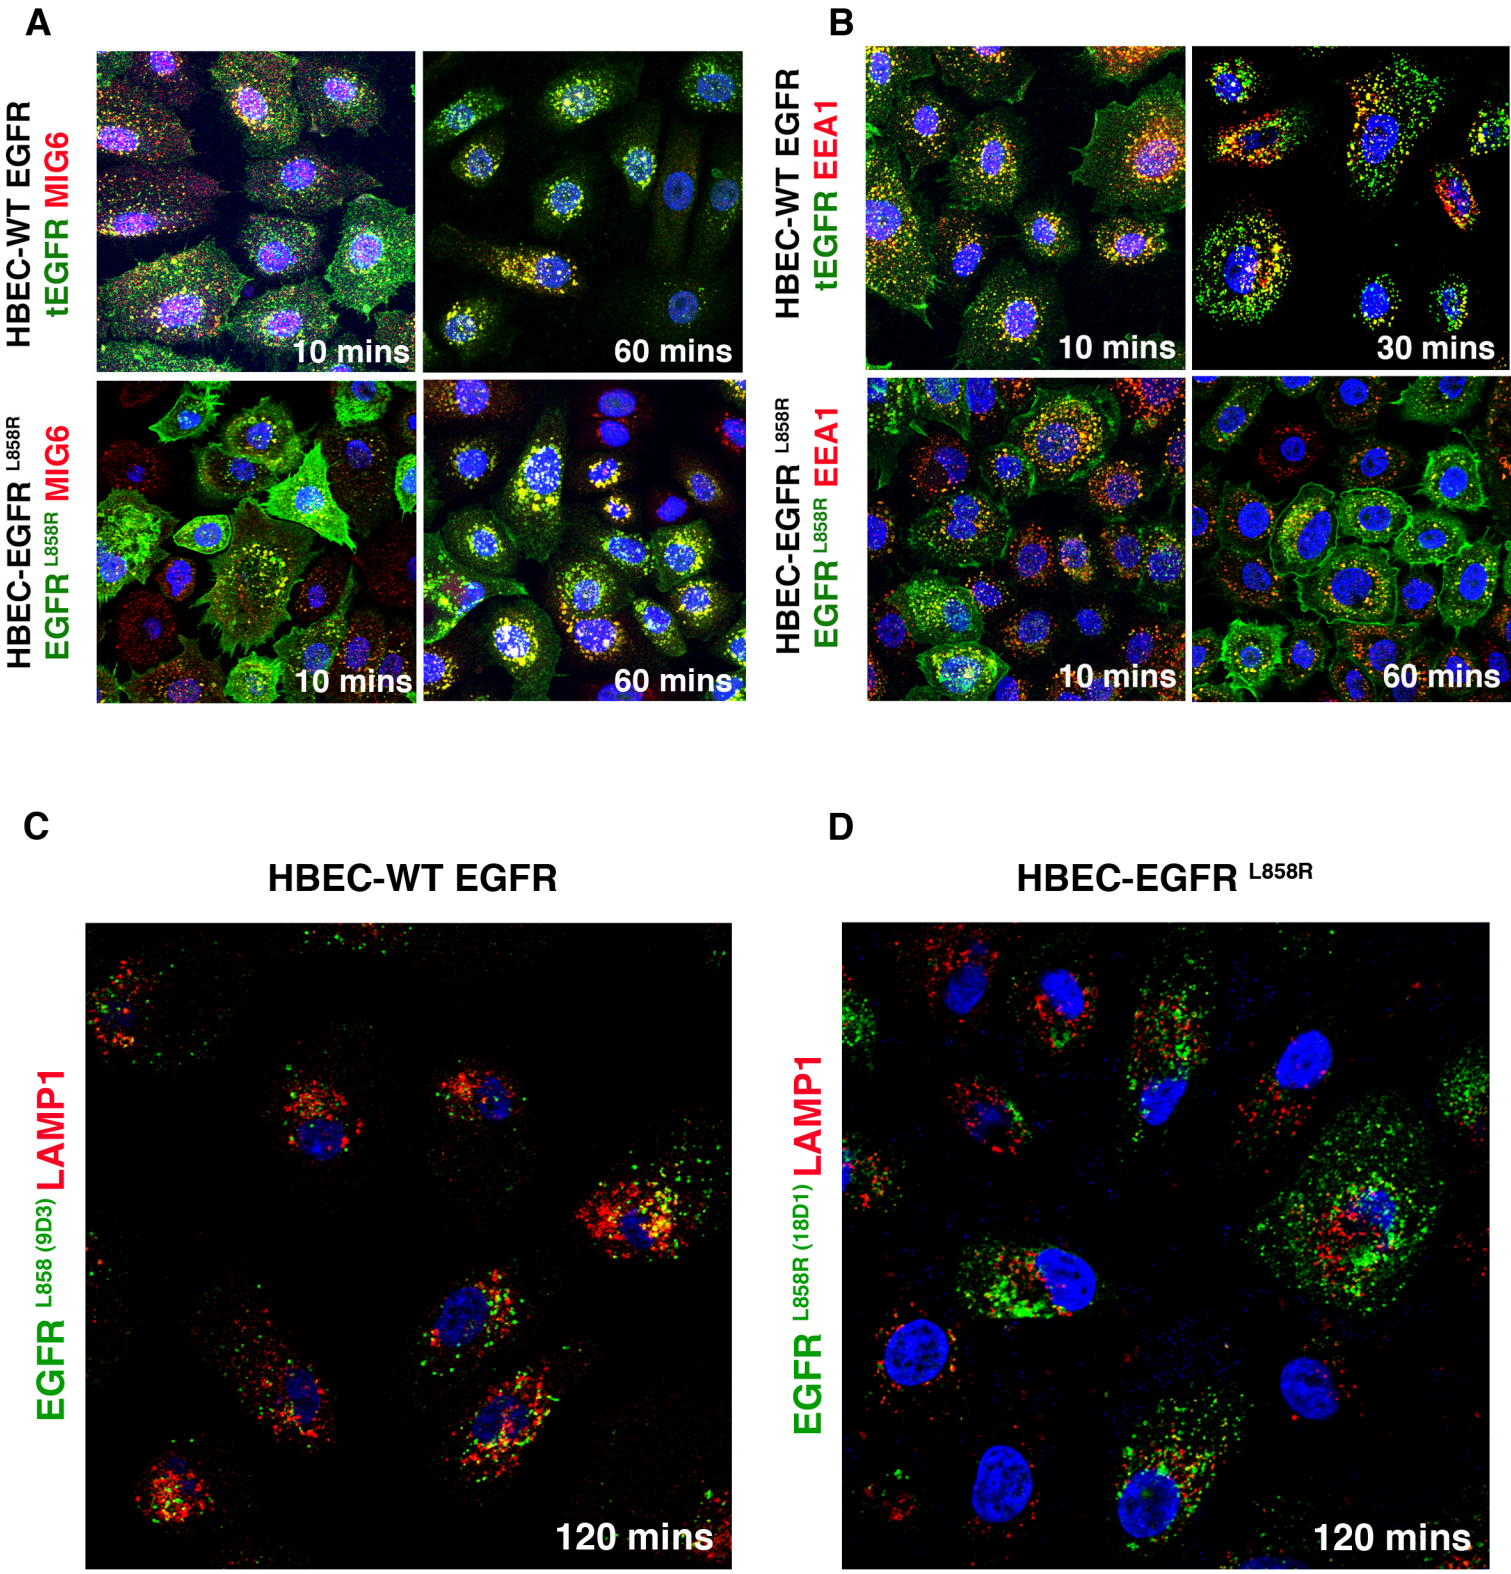

Supplement: NIHMS668510-supplement-2.pdf [file NIHMS668510-supplement-2.pdf]
